# Supplementary material for: Replication defective viral genomes exploit a cellular pro-survival mechanism to establish paramyxovirus persistence
Source: PubMed Central journal article supplement (PMC5630589; doi:10.1038/s41467-017-00909-6), 2017-10-06
Supplement: 41467_2017_909_MOESM1_ESM.pdf [file 41467_2017_909_MOESM1_ESM.pdf]

## Supplementary Figure 1

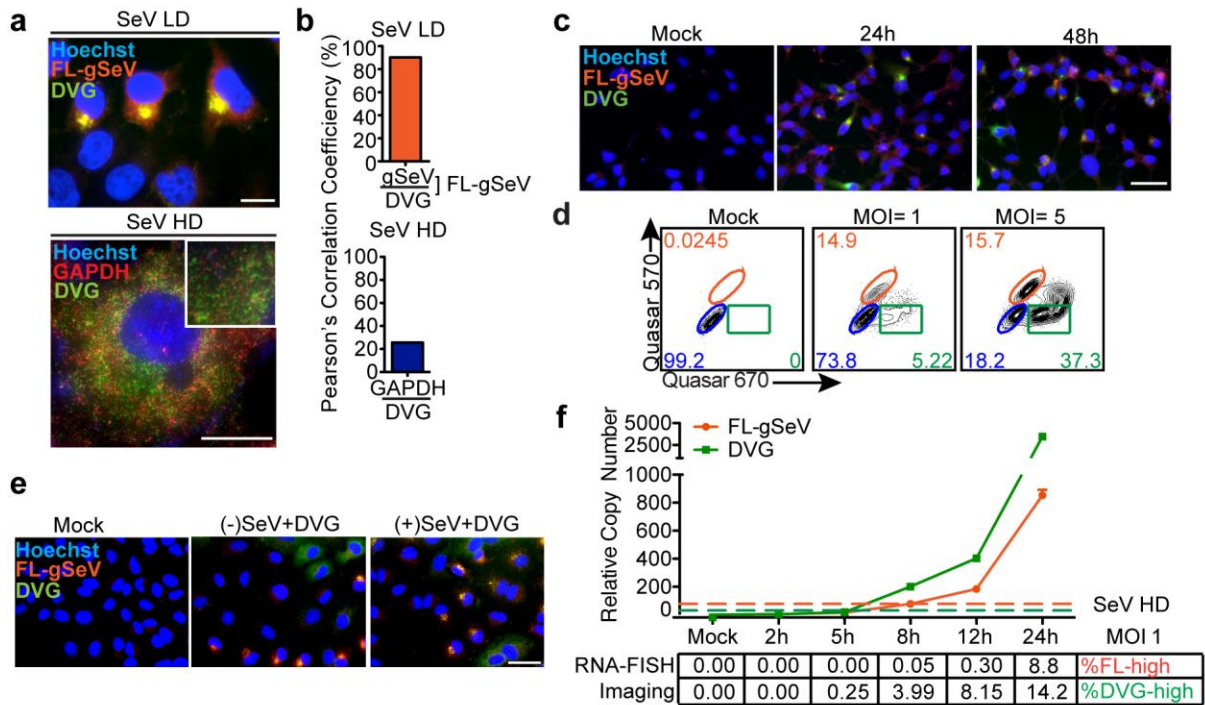

**Supplementary Figure 1: Quality control of RNA FISH probes for DVG and gSeV detection.** (a) Representative RNA FISH images of A549 cells infected with SeV LD (MOI=1.5 TCID<sub>50</sub>/cell for 24 h, as positive control) or HD (MOI=5 TCID<sub>50</sub>/cell for 6 h) after hybridization with probes designed against the 5' end of the viral genome (DVG, Quasar-670-labeled), and probes designed against the 3' end of the viral genomes (FL-gSeV, Quasar-570 labeled) or against host *GAPDH* mRNA. Magnification: SeV LD 100X. Bar: 10µm. The SeV HD infection panel was cropped from a 60X magnification image. (b) Co-localization efficiency of Quasar-570 labeled probes with gSeV or GAPDH mRNA with Quasar-670 labeled DVG probes in SeV LD and HD infected cells shown in (a). (c) Merged representative RNA FISH images of TC-1 cells infected with SeV HD (MOI=1.5 TCID<sub>50</sub>/cell) for the indicated times. Magnification: 40X. Scale bar =20 µm. (d) A549 cells were infected with SeV HD at either a MOI of 1 or 5 TCID<sub>50</sub>/cell for 24 h. Representative RNA FISH-FLOW graph. Gates correspond to non-detected (ND, blue), FL-gSeV-high cell (FL-high, orange), and DVG-high cells (DVG-high, green). Related to Fig.1e. (e) Merged representative RNA FISH image of A549 cells infected with SeV HD (MOI=1.5 TCID<sub>50</sub>/cell) for 24 h. Magnification: 40X. Scale bar = 20µm. (f) A549 cells were infected with SeV HD (MOI=1 TCID<sub>50</sub>/cell) and collected at the indicated time points. Copy numbers of (+)FL-gSeV and (+)DVG were quantified by RT-qPCR (line graph) while percentage of FL-high and DVG-high within the infected culture were quantified by RNA-FISH imaging (table). The experiment was independently repeated twice. RT-qPCR data are expressed as the copy number relative to the housekeeping gene *GAPDH* mRNA. See also the Supplementary Methods section.

## Supplementary Figure 2

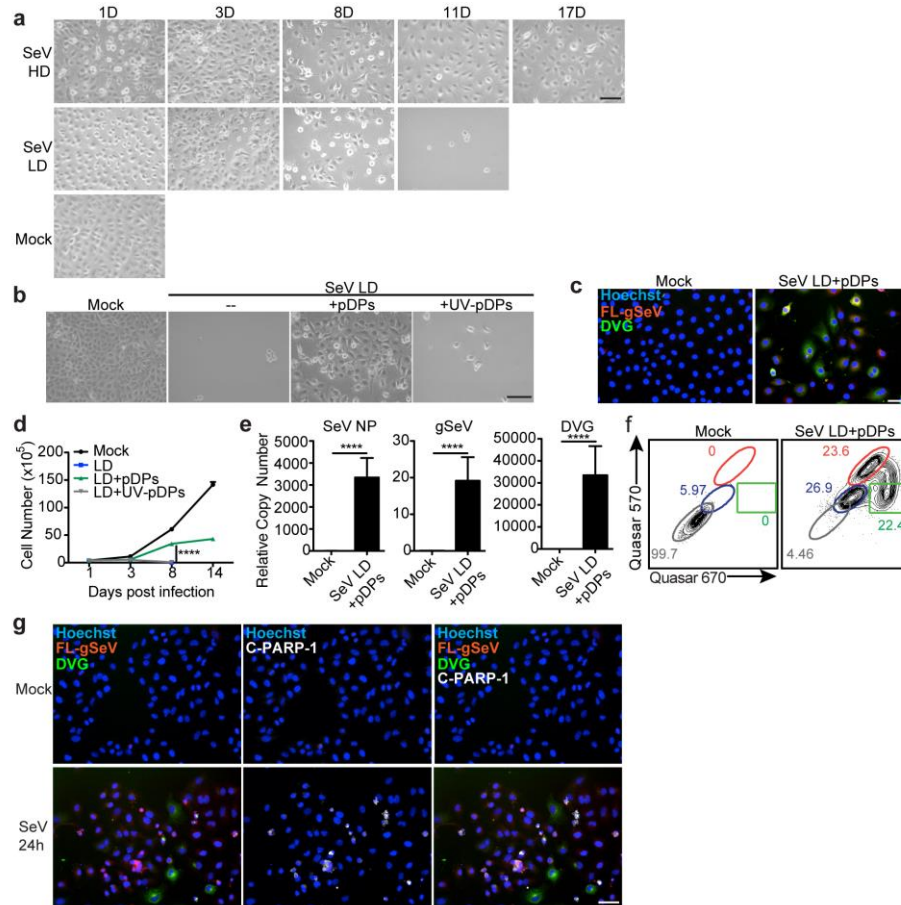

**Supplementary Figure 2: DVG-enriched cells are less prone to SeV induced apoptosis compared to FL-gSeV-enriched cells.** (a) Bright field images corresponding to RNA FISH images shown in Fig. 2a. One representative repeat is shown. Magnification: 20X. Scale bar = 20 $\mu$ m. (b-f) LLC-MK2 cells were mock infected or infected with SeV LD alone or in the presence of pDPs or UV inactivated pDPs (HAU = 300) and subcultured for 14 days. (b) Bright field images at 8 days post infection. One representative field from each treatment is shown. Magnification: 20X. Scale bar = 20 $\mu$ m. (c) Representative RNA FISH images of LLC-MK2 cell mock infected or infected with SeV LD+pDPs survived from death crisis at day 14 post infection. (d) Total cell numbers during the infection time course. (mean  $\pm$  s.e.m.; n=3). (e) Expression of SeV NP mRNA, FL-gSeVs, and DVGs in survivor cells at day 14 post infection. (mean  $\pm$  s.e.m.; n=3). (f) Representative RNA FISH-FLOW analysis of LLC-MK2 cells at day 14 after mock or SeV LD+pDPs infection. The percentages of ND (blue), FL-high (orange), and DVG-high (green) in the culture are indicated. (g) Representative RNA FISH-IF image for C-PARP-1 protein staining of A549 cells 24 h post SeV HD infection. Quantification of the images is shown in Fig. 2i. Hoechst signals were merged either with RNA FISH probes signals (left), C-PARP-1 signals (middle) and all channels (right). \*\*\*\*p<0.0001 by two-way ANOVA analysis with Bonferroni *post hoc* analysis (d) or unpaired t-test (e). Magnification: 20X. Scale bar = 20 $\mu$ m. See also the Supplementary Methods section.

### Supplementary Figure 3

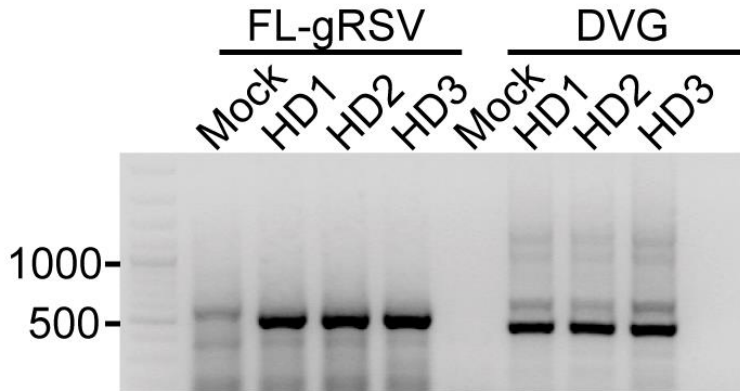

**Supplementary Figure 3: DVG promote persistent RSV infection.** PCR detection of FL-gRSV and DVGs in RSV HD infected A549 cells on day 23 post-infection. Samples from three different experiments (HD1, HD2 and HD3) and a non-infected control (Mock) are shown. See also the Supplementary Methods section.

## Supplementary Figure 4

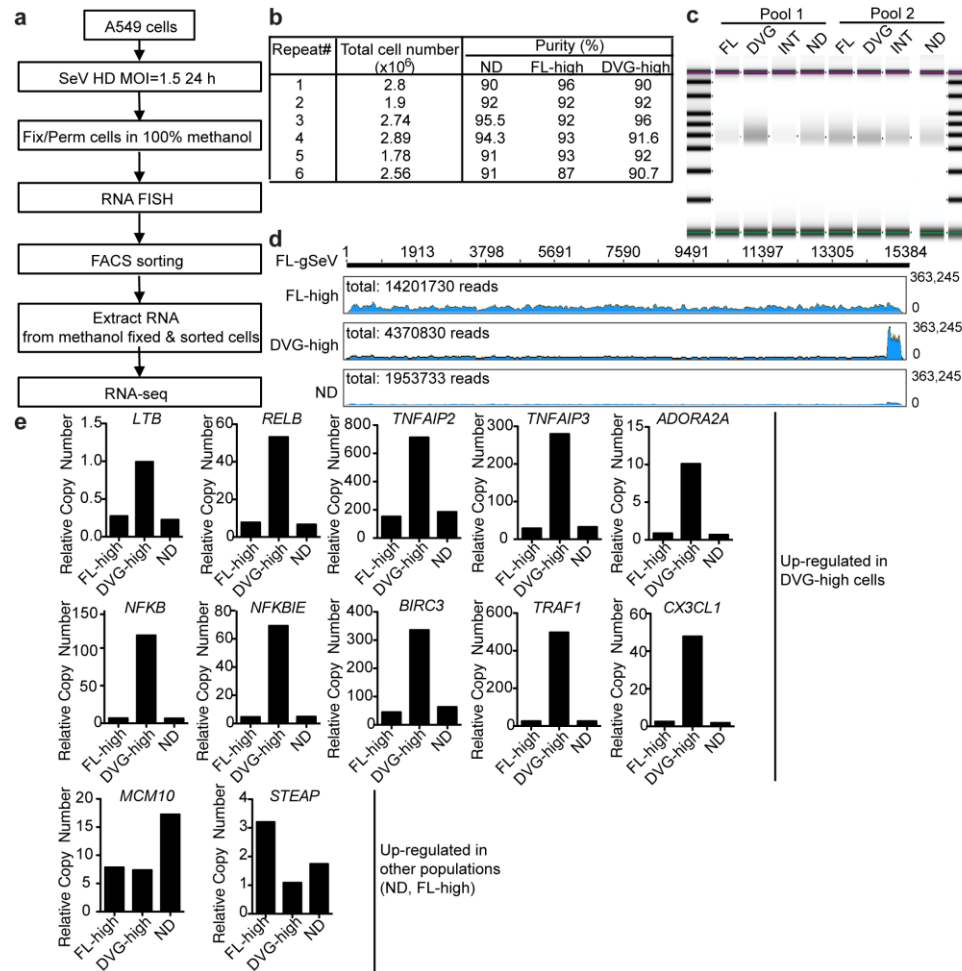

**Supplementary Figure 4: Quality control of transcriptional profiling based on cells sorted by DVG and FL-gSeV content.** (a) Flow chart of sample preparations for RNA-seq analysis. (b) Quality control of six independently repeated sorting prepared for RNA-seq. Total cell number after sorting and sorted cell purity of each sub-population are shown. (c) Quality control of cDNA samples by Qubit assay after reverse transcription. Pool 1 includes samples 1-3 and Pool 2, samples 4-6. (d) Integrated Genome Viewer representation of SeV Cantell strain (positive sense) reads from FL-high, DVG-high and ND cells sorted from SeV HD infected A549 cells. Histogram shows synopsis of total coverage in any given position of FL-gSeV (illustrated in black bar on top of the graph). Number on the right side of the graph represents the total reads at the position with highest coverage. Number of total reads aligning to SeV Cantell strain from each sub-population is indicated in the upper left corner of each histogram. (e) Gene expression verification by RT-qPCR of selected genes among differentially expressed genes after multiple comparison analysis as shown in Fig. 4a. Data are expressed as copy number relative to the housekeeping gene *GAPDH* averaged from two pools.

## Supplementary Figure 5

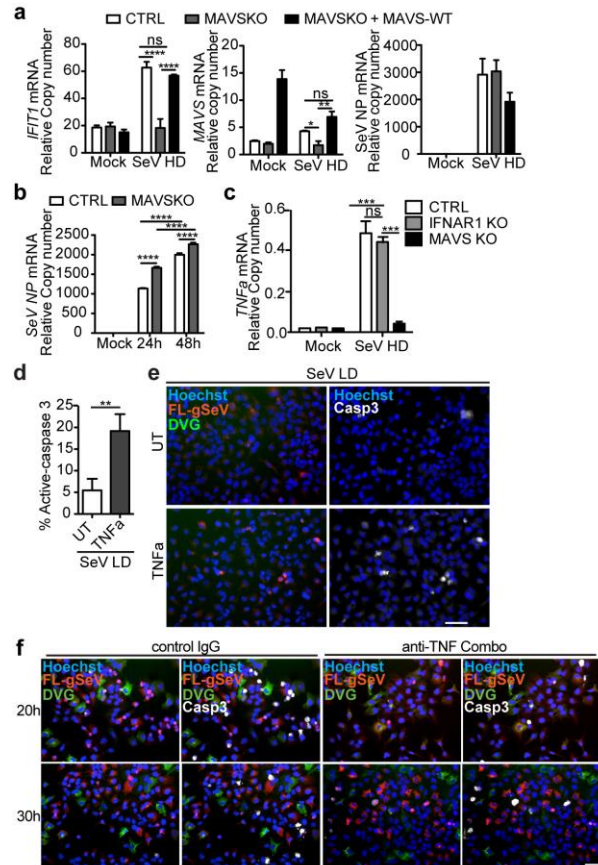

**Supplementary Figure 5: DVGs dictate the function of TNF $\alpha$  during SeV infection.** (a) CTRL and MAVS KO A549 cells were mock transfected or transfected with MAVS-WT expression plasmid for 6 h before infection with SeV HD (MOI=1.5 TCID<sub>50</sub>/cell). Expression of IFIT1, MAVS, and SeV NP mRNA was quantified by RT-qPCR. (b) Expression of SeV NP mRNA in CTRL and MAVS KO A549 cells at 24 and 48 h post SeV HD infection. Data are expressed as the copy number relative to the housekeeping gene *GAPDH*. (c) TNF $\alpha$  mRNA expression from A549 CTRL, IFNAR1 KO, and MAVS KO cells mock infected or infected with SeV HD (MOI=1.5 TCID<sub>50</sub>/cell) for 24 h. Data are expressed copy number relative to the housekeeping gene *GAPDH*. (d,e) A549 MAVS KO cells were infected with SeV LD (MOI=1.5 TCID<sub>50</sub>/cell) for 16 h and then left untreated (UT) or treated with TNF $\alpha$  (10 ng/ml) for 8 h. (d) Percentage of apoptotic cells in each condition. (e) Representative RNA FISH-IF images of active-caspase 3 protein (white), FL-gSeV genome (orange) and DVGs (green) staining of infected cells. Hoechst signals were merge respectively with RNA FISH probes signals (left columns) and active-caspase 3 (right columns). (f) RNA-FISH-IF staining of A549 cells infected with SeV HD (MOI=1 TCID<sub>50</sub>/cell) and incubated with control IgG antibody or antibodies against TNF $\alpha$ , TNFR1, or and TNFR2 (anti-TNF Combo). Hoechst signals were merged with RNA FISH signals (left columns) or all channels (right columns). Magnification: 20X. Scale bar =20 $\mu$ m. Values represent mean  $\pm$  s.e.m. from 3 independently repeated experiments, unless indicated. \*\*\*p<0.001, \*\*\*\*p<0.0001 by two-way ANOVA with Bonferroni *post hoc* analysis (a-c). \*\*p<0.01 by student's t test (d). ns=non-significant.



## Supplementary Figure 6

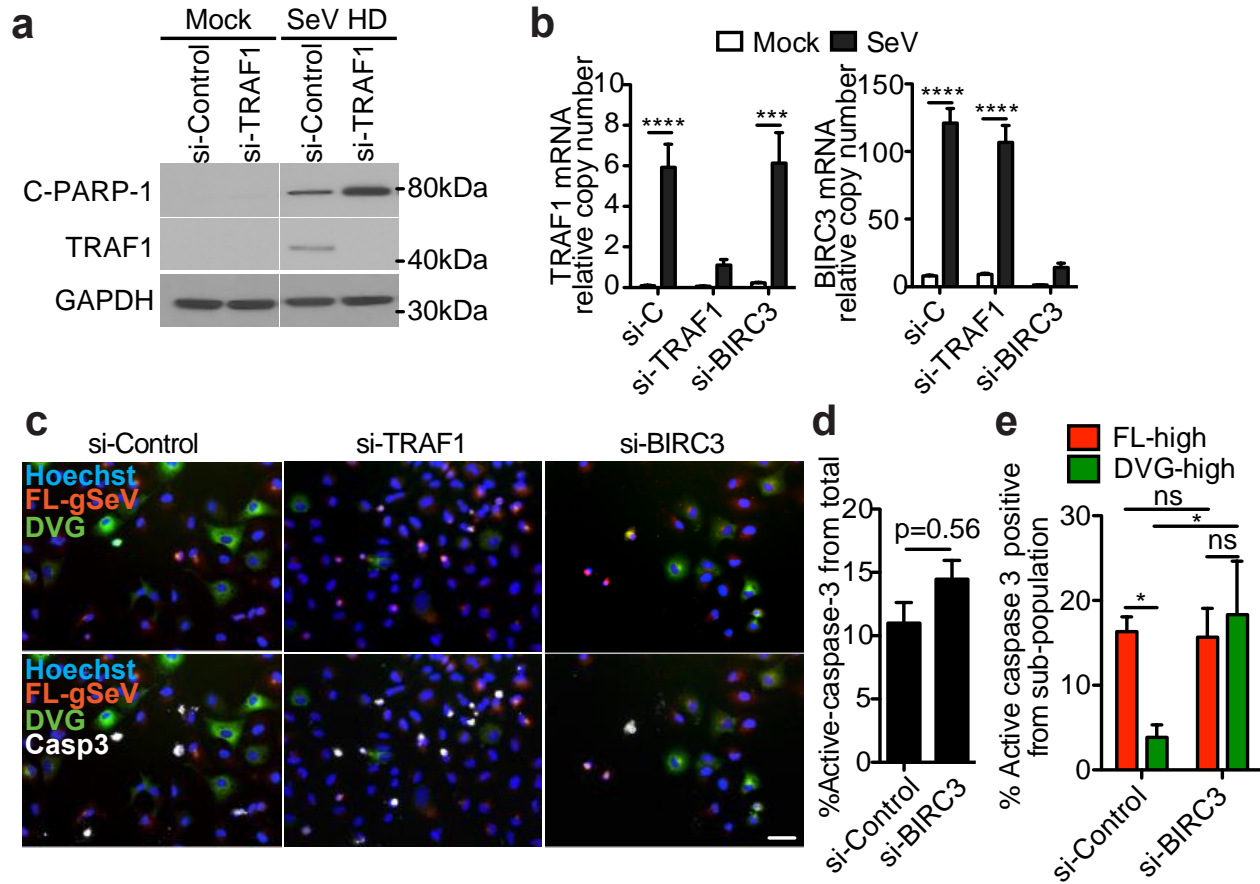

**Supplementary Figure 6: TRAF1 and BIRC3 knockdown enhance apoptosis of DVG-high cells.** A549 cells were transfected with either control siRNA (si-Control) or *TRAF1* siRNA (si-*TRAF1*) and infected with SeV HD. (a) Western Blot analysis of si-Control and si-*TRAF1* treated cells infected with SeV HD to confirm specific knockdown of TRAF1 protein. (b) Expression of TRAF1 and BIRC3 mRNA in si-Control, si-*TRAF1*, or si-BIRC3-treated cells infected with SeV HD to confirm specific transient silencing of TRAF1 and BIRC3 expression, respectively. Gene expression is shown as copy number relative to a house keeping gene GAPDH expression. Error bars indicate mean  $\pm$  s.e.m. of three independent experiments \*\*\* $p < 0.001$ , \*\*\*\* $p < 0.0001$  by two-way ANOVA with Bonferroni post hoc test. (c) Representative RNA FISH-IF images of active-caspase 3 staining 24 h after SeV HD infection (MOI=1.5 TCID<sub>50</sub>/cell) of cells treated with si-Control, si-*TRAF1*, or si-BIRC3. Hoechst signals were merged with RNA FISH probes signals (upper panel) or all channels (lower panel). Magnification: 20X. Scale bar = 20 $\mu$ m. (d) Percentage of apoptotic cells within the total cell cultures treated with si-Control or si-BIRC3 (mean  $\pm$  s.e.m.; n=3, unpaired t-test). (e) Percentage of active-caspase 3 positive cells within FL-high and DVG-high cells in the same conditions shown in d. (mean  $\pm$  s.e.m.; n=3). \* $p < 0.05$  by two-way ANOVA with Bonferroni's *post hoc* test. ns=non-significant. See also the Supplementary Methods section.

**Supplementary Table 1 Primers used in RT-qPCR assays.**

| <b>Name</b>    | <b>Forward (5'-3')</b> | <b>Reverse (5'-3')</b>       |
|----------------|------------------------|------------------------------|
| <i>TRAF1</i>   | ctgtgcaggctgtctctctg   | cggcttcctgggcttatag          |
| <i>LTB</i>     | ggcgggtgcctatcactgt    | gaaaccccagtccttgctg          |
| <i>TNFAIP3</i> | tgcacactgtgttcacgag    | acgctgtgggactgactttc         |
| <i>NFKBIE</i>  | ctcatccactctgtgcaagg   | tcatcaaagggcaaaaggac         |
| <i>NFKB2</i>   | cacatgggtggaggctct     | actggtaggggctgtaggc          |
| <i>RELB</i>    | aagaaaaagccggccatc     | cacgggtccagagaagaagt         |
| <i>MCM10</i>   | caaggaaaagatggccagag   | tccatagctgaaggttttcc         |
| <i>TNFAIP2</i> | catcgccactgtagacacga   | accaggtgcaggtgcaag           |
| <i>ADORA2A</i> | ctacattgccatccgcac     | aacctagcatgggagtcagg         |
| <i>CX3CL1</i>  | ggctccgatctctctgctg    | atggtgcatttcgtcacacc         |
| <i>BIRC3</i>   | gcttgaaaagactgggcttg   | aagaagtcgtttcctcctttgt       |
| <i>TRAF2</i>   | ggaacacacctgcccctct    | ggtcgagcagcattaaggtc         |
| <i>STEAP3</i>  | gcctcagaccctcagtc      | gctactatcgctgtccaccag        |
| <i>GAPDH</i>   | gcaaattccatggcaccgt    | tcgccccacttgattttgg          |
| <i>IFNB1</i>   | gtcagagtcgaaatcctaag   | acagcatctgctggttgaag         |
| <i>SeV NP</i>  | tgccctggaagatgagttag   | gcctggtggtttgtggtgaag        |
| <i>SeV DVG</i> | cctcaggttcctgatctcac   | accagacaagagttaagagatatgtatt |
| <i>FL-gSeV</i> | aatctaggtatctcactccatg | aagagattctcgagtatcagaa       |

**Supplementary Table 2 Target sequence positions for (+)SeV RNA FISH probes.**

| <b>Probe #</b> | <b>Position on (+)FL-gSeV genome (GenBank ID: AB855654.1)</b> |
|----------------|---------------------------------------------------------------|
| gSeV 1         | 45-65                                                         |
| gSeV 2         | 99-18                                                         |
| gSeV 3         | 127-146                                                       |
| gSeV 4         | 466-485                                                       |
| gSeV 5         | 1363-1382                                                     |
| gSeV 6         | 2075-2094                                                     |
| gSeV 7         | 2150-2169                                                     |
| gSeV 8         | 2815-2834                                                     |
| gSeV 9         | 3646-3665                                                     |
| gSeV 10        | 4712-4731                                                     |
| gSeV 11        | 4827-4846                                                     |
| gSeV 12        | 5210-5229                                                     |
| gSeV 13        | 5314-5333                                                     |
| gSeV 14        | 5702-5721                                                     |
| gSeV 15        | 6389-6408                                                     |
| gSeV 16        | 6580-6599                                                     |
| gSeV 17        | 6901-6920                                                     |
| gSeV 18        | 7065-7084                                                     |
| gSeV 19        | 7270-7289                                                     |
| gSeV 20        | 7411-7430                                                     |
| gSeV 21        | 7444-7463                                                     |
| gSeV 22        | 7728-7747                                                     |
| gSeV 23        | 8421-8440                                                     |
| gSeV 24        | 9183-9202                                                     |
| gSeV 25        | 9938-9957                                                     |
| gSeV 26        | 10205-10224                                                   |
| gSeV 27        | 10746-10765                                                   |
| gSeV 28        | 11132-11151                                                   |
| DVG1           | 14944-14963                                                   |
| DVG2           | 14966-14985                                                   |
| DVG3           | 14990-15009                                                   |
| DVG4           | 15019-15038                                                   |
| DVG5           | 15041-15060                                                   |
| DVG6           | 15065-15084                                                   |
| DVG7           | 15109-15128                                                   |
| DVG8           | 15132-15151                                                   |
| DVG9           | 15169-15188                                                   |
| DVG10          | 15191-15210                                                   |
| DVG11          | 15213-15232                                                   |
| DVG12          | 15235-15254                                                   |
| DVG13          | 15258-15277                                                   |
| DVG14          | 15285-15304                                                   |
| DVG15          | 15321-15340                                                   |



**Supplementary Table 3 Target sequence positions for (-)SeV RNA FISH probes.**

| <b>Probe #</b> | <b>Position on (-)FL-gSeV genome<br/>(Complementary sequence of<br/>GenBank ID: AB855654.1)</b> |
|----------------|-------------------------------------------------------------------------------------------------|
| negSeV1        | 1960-1979                                                                                       |
| negSeV3        | 2185-2204                                                                                       |
| negSeV4        | 2594-2613                                                                                       |
| negSeV5        | 2736-2755                                                                                       |
| negSeV6        | 2938-2957                                                                                       |
| negSeV8        | 4396-4415                                                                                       |
| negSeV9        | 5024-5043                                                                                       |
| negSeV10       | 5459-5478                                                                                       |
| negSeV11       | 5634-5653                                                                                       |
| negSeV12       | 6134-6153                                                                                       |
| negSeV13       | 6610-6629                                                                                       |
| negSeV14       | 6892-6911                                                                                       |
| negSeV15       | 7021-7040                                                                                       |
| negSeV16       | 7088-7107                                                                                       |
| negSeV17       | 7239-7258                                                                                       |
| negSeV18       | 9252-9271                                                                                       |
| negSeV19       | 9830-9849                                                                                       |
| negSeV20       | 10183-10202                                                                                     |
| negSeV21       | 10305-10324                                                                                     |
| negSeV23       | 10805-10824                                                                                     |
| negSeV24       | 11184-11203                                                                                     |
| negSeV25       | 11624-11643                                                                                     |
| negSeV26       | 11780-11799                                                                                     |
| negSeV27       | 12220-12239                                                                                     |
| negSeV28       | 12998-13017                                                                                     |
| negSeV29       | 13666-13685                                                                                     |

**Supplementary Table 4 Target sequence positions for RSV RNA FISH probes.**

| <b>Probe #</b> | <b>Position on (+)FL-gRSV genome (GenBank ID: AF035006)</b> |
|----------------|-------------------------------------------------------------|
| gRSV 1         | 361-380                                                     |
| gRSV 3         | 718-737                                                     |
| gRSV 4         | 957-976                                                     |
| gRSV 6         | 1322-1341                                                   |
| gRSV 8         | 1738-1756                                                   |
| gRSV 9         | 2052-2071                                                   |
| gRSV 10        | 2267-2286                                                   |
| gRSV 12        | 2429-2448                                                   |
| gRSV 13        | 2912-2932                                                   |
| gRSV 15        | 3437-3456                                                   |
| gRSV 16        | 3872-3891                                                   |
| gRSV 17        | 4951-4970                                                   |
| gRSV 19        | 5657-5676                                                   |
| gRSV 20        | 6277-6296                                                   |
| gRSV 21        | 6713-6730                                                   |
| gRSV 22        | 6865-6884                                                   |
| gRSV 23        | 7036-7055                                                   |
| gRSV 24        | 7604-7623                                                   |
| gRSV 25        | 8103-8122                                                   |
| gRSV 26        | 8336-8335                                                   |
| gRSV 27        | 8917-8935                                                   |
| gRSV 28        | 10835-10854                                                 |
| gRSV 29        | 10972-10991                                                 |
| gRSV 30        | 11504-11523                                                 |
| gRSV 31        | 11637-11656                                                 |
| gRSV 32        | 11940-11959                                                 |
| DVG 1          | 14923-14942                                                 |
| DVG 3          | 15019-15038                                                 |
| DVG 4          | 15089-15108                                                 |
| DVG 5          | 15111-15130                                                 |
| DVG 6          | 15134-15153                                                 |
| DVG 7          | 15156-15175                                                 |
| DVG 8          | 15181-15200                                                 |
| DVG 9          | 15203-15222                                                 |

## **Supplementary methods**

### **RNA FISH probe specificity analysis.**

For testing DVG RNA FISH probe specificity, A549 cells infected with SeV LD or SeV HD were fixed, permeabilized, and hybridized with Quasar-670 labeled DVG probes and Quasar-570 labeled gSeV probes or Quasar-570 labeled GAPDH probe at 125 nM concentration diluted in hybridization buffer. Hybridization was performed overnight in a humidified chamber at 37°C. Nuclear staining using 0.5 µg/ml of Hoechst 33342 was performed afterwards and the coverslips were mounted in GLOX anti-fade media. Imaging acquisition was performed with a Nikon E600 epifluorescence microscope equipped with a 100X, 1.4 numerical aperture oil immersion objective (Zeiss) and a Zeiss AxioCam MRm camera. Imaging acquisition of SeV HD samples was performed with a Nikon Ti-E inverted fluorescence microscope equipped with a 100X Plan-Apo objective (numerical aperture of 1.43) and with a cooled CCD camera (Andor iKon 934). Colocalization quantification was performed in Volocity Quantitation module (Perkin Elmer). Global Pearson Correlation (PCC) analysis was performed by drawing multiple regions of interest (ROI) corresponding to different cells and calculating an average. Quantification results of the representative images are shown in Supplementary Fig. 1a.

### **FISH probe sensitivity assay**

A549 cells were infected with SeV HD at a MOI=1 TCID<sub>50</sub>/cell and harvested 2, 5, 8, 12, and 24 h later for analysis. Fixed cells were then processed for RNA FISH as described in detail in the methods section of the main text using probes against FL-gSeV or DVGs. RNA FISH images were quantified and the percentage of FL-high or DVG-high cells was calculated and plotted in

function of time. (+)FL-gSeV and (+)DVGs were also quantified by RT-qPCR. For this, 1-2 µg of isolated total RNA were reverse transcribed using Superscript III without RNaseH activity to avoid self-priming (primer: 5'-GGTGAGGAATCTATACGTTATAC-3'). Recombinant RNase H (Invitrogen) was later added to the reverse transcribed samples. cDNA was amplified with viral product-specific qPCR primers in the presence of SYBR green (Applied Biosystem) using primer set: (+)FL-gSeV (for: 5'-GACCAGGAAATAAAGAGTGCA-3'; rev: CGATGTATTGGCATATAGCGT-3'); (+) DVG: (for: 5'-TCCAAGACTATCTTTATCTATGTCC-3'; rev: GGTGAGGAATCTATACGTTATAC-3'). Copy numbers were normalized to the housekeeping gene *GAPDH*. Detection threshold for both (+)FL-gSeV and (+)DVG were below 100 copies..

#### **pDPs supplementation and long-term subculture.**

pDPs were prepared as described in the method section of the main text and inactivated under UV light (254nm at 6 inches distance) for 6 min (UV-pDPs). For SeV infection with pDPs supplementation, LLC-MK2 cells were infected with SeV LD (MOI=1 TCID<sub>50</sub>/cell) plus either pDPs or UV-pDPs (HAU=300). Infected cells were sub-cultured on days 3 and 8 post infection and harvested on day 14 post infection for endpoint analysis, methods for each assay are described in the method section of the main text.

#### **Protein detection**

The amount of TNFα in SeV infected A549 cells was measured by Enzyme-linked immunosorbent assay (ELISA) using a human TNFα detection kit (R&D system) according to the manufacturer's instructions. For western blots, whole cellular extracts were prepared from

pelleted cells in a NP-40-based lysis buffer containing phosphatase inhibitors, proteinase inhibitors (Roche and Thermo Scientific). Concentration of protein was measured by BCA assay (Thermo Scientific). For each sample, 20 µg of protein extract were boiled for 5 min and resolved on 10% Bis-Tris precast gels (Bio-Rad) followed by transfer to a polyvinylidene fluoride (PVDF) membrane (Millipore). The membrane was blocked with 5% non-fat milk and immunoblotted with mouse anti-TRAF1 (1: 1000 dilution, Santa Cruz, sc-6253), mouse anti-GAPDH (1: 5000 dilution, Sigma, G-8795), or anti- mouse IgG (HRP-conjugated, 1:10000 dilution, Jackson Immunologicals, Cat#115-035-044). Lumi-Light western blotting substrate (Roche) was used for HRP detection according to the manufacturer's protocol.
